# Supplementary material for: Clinical and Microbiological Efficacy of Pyrophosphate Containing Toothpaste: A Double-Blinded Placebo-Controlled Randomized Clinical Trial
Source: PubMed Central journal article supplement (PMC7698517; doi:10.3390/microorganisms8111806), 2020-11-17
Supplement: microorganisms-08-01806-s001.pdf [file microorganisms-08-01806-s001.pdf]

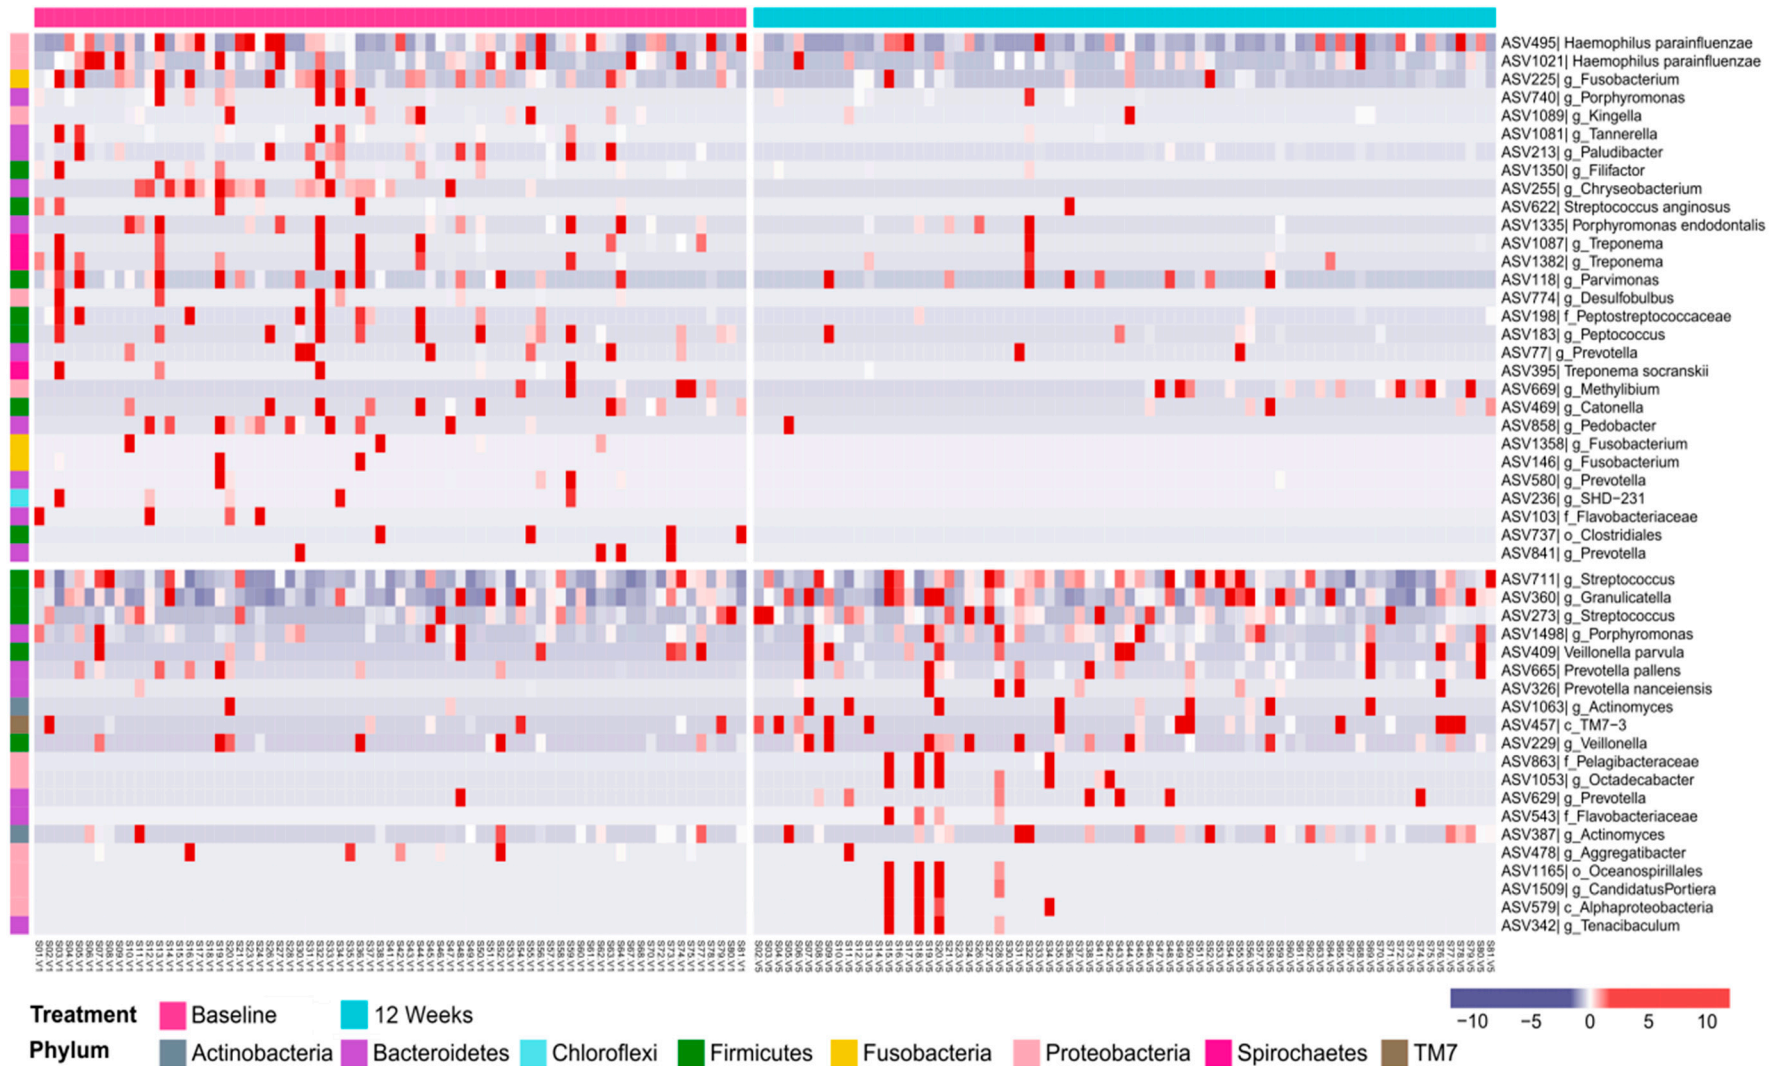

Figure S1. Linear discriminant analysis effect sized (LEfSE) analysis of microbiome in baseline and 12 weeks.

**Table S1.** Species which showed significant difference (linear discriminant analysis (LDA) score  $\geq 2.5$ ) in linear discriminant analysis effect sized (LEfSe) analysis. (A) ASVs of control group which showed significant difference between baseline and 12 weeks. (B) ASVs of test group which showed significant difference between baseline and 12 weeks. u.i, Unidentified

**(A) Control**

| Phylum        | Class          | Order            | Family             | Genus            | Species | ASV    | Time     | LDA score | P value  | Mean RA in baseline (%) | Mean RA in 12 weeks (%) |
|---------------|----------------|------------------|--------------------|------------------|---------|--------|----------|-----------|----------|-------------------------|-------------------------|
| Bacteroidetes | Flavobacteriia | Flavobacteriales | Flavobacteriaceae  | Capnocytophaga   | u.i     | ASV110 | Baseline | 2.4569    | 0.018    | 0.05±0.18               | 0                       |
| Fusobacteria  | Fusobacteriia  | Fusobacteriales  | Fusobacteriaceae   | Fusobacterium    | u.i     | ASV225 | Baseline | 3.0469    | 0.0047   | 0.25±0.40               | 0.06±0.13               |
| Bacteroidetes | Flavobacteriia | Flavobacteriales | Weeksellaceae      | Chryseobacterium | u.i     | ASV255 | Baseline | 2.6588    | 2.25E-05 | 0.07±0.15               | 0                       |
| Bacteroidetes | Bacteroidia    | Bacteroidales    | Porphyromonadaceae | Paludibacter     | u.i     | ASV213 | Baseline | 2.3868    | 0.034    | 0.04±0.13               | 0.0024±0.01             |

**(B) Test**

| Phylum         | Class               | Order           | Family             | Genus           | Species        | ASV     | Time     | LDA score | P value  | Mean RA in baseline (%) | Mean RA in 12 weeks (%) |
|----------------|---------------------|-----------------|--------------------|-----------------|----------------|---------|----------|-----------|----------|-------------------------|-------------------------|
| Proteobacteria | Gammaproteobacteria | Pasteurellales  | Pasteurellaceae    | Haemophilus     | parainfluenzae | ASV495  | Baseline | 4.1743    | 3.55E-05 | 4.72±5.14               | 1.57±3.25               |
| Proteobacteria | Betaproteobacteria  | Neisseriales    | Neisseriaceae      |                 |                | ASV309  | Baseline | 3.4063    | 0.034    | 0.03±0.14               | 0.0007±0.0042           |
| Proteobacteria | Betaproteobacteria  | Neisseriales    | Neisseriaceae      |                 |                | ASV354  | Baseline | 3.341     | 0.0093   | 0.45±1.11               | 0.09±0.42               |
| Fusobacteria   | Fusobacteriia       | Fusobacteriales | Fusobacteriaceae   | Fusobacterium   | u.i            | ASV225  | Baseline | 3.311     | 0.015    | 0.57±1.10               | 0.14±0.47               |
| Proteobacteria | Gammaproteobacteria | Pasteurellales  | Pasteurellaceae    | Aggregatibacter |                | ASV675  | Baseline | 3.2736    | 0.045    | 0.37±1.51               | 0.0067±0.04             |
| Bacteroidetes  | Bacteroidia         | Bacteroidales   | Porphyromonadaceae | Tannerella      | u.i            | ASV1081 | Baseline | 3.2389    | 0.0016   | 0.30±1.11               | 0.0048±0.03             |
| Proteobacteria | Gammaproteobacteria | Pasteurellales  | Pasteurellaceae    | Haemophilus     | parainfluenzae | ASV1021 | Baseline | 3.2309    | 0.011    | 0.54±1.12               | 0.20±0.57               |

|                |                        |                  |                       |                |     |         |          |        |        |                 |               |
|----------------|------------------------|------------------|-----------------------|----------------|-----|---------|----------|--------|--------|-----------------|---------------|
| Proteobacteria | Betaproteobact<br>eria | Burkholderiales  | Comamonadaceae        |                |     | ASV570  | Baseline | 3.2246 | 0.020  | 0.70±1.06       | 0.37±0.70     |
| Firmicutes     | Clostridia             | Clostridiales    | Lachnospiraceae       | Catonella      | u.i | ASV469  | Baseline | 3.178  | 0.024  | 0.015±0.04<br>3 | 0.0013±0.0048 |
| Firmicutes     | Clostridia             | Clostridiales    | Lachnospiraceae       |                |     | ASV479  | Baseline | 3.0772 | 0.027  | 0.028±0.14      | 0.002±0.014   |
| Chloroflexi    | Anaerolineae           | Anaerolineales   | Anaerolinaceae        | SHD-231        | u.i | ASV236  | Baseline | 3.0389 | 0.039  | 0.016±0.07      | 0             |
| Bacteroidetes  | Flavobacteriia         | Flavobacteriales | Flavobacteriaceae     | Capnocytophaga | u.i | ASV900  | Baseline | 3.0351 | 0.050  | 0.53±0.80       | 0.47±1.46     |
| Bacteroidetes  | Bacteroidia            | Bacteroidales    | Prevotellaceae        | Prevotella     | u.i | ASV594  | Baseline | 2.952  | 0.0052 | 0.03±0.066      | 0             |
| Firmicutes     | Clostridia             | Clostridiales    | Peptostreptococcaceae | Filifactor     | u.i | ASV1350 | Baseline | 2.9113 | 0.023  | 0.12±0.48       | 0.004±0.016   |
| Spirochaetes   | Spirochaetes           | Spirochaetales   | Spirochaetaceae       | Treponema      | u.i | ASV787  | Baseline | 2.6795 | 0.039  | 0.053±0.22      | 0             |

|                |                     |                   |                   |                  |     |        |          |        |        |              |              |
|----------------|---------------------|-------------------|-------------------|------------------|-----|--------|----------|--------|--------|--------------|--------------|
| Bacteroidetes  | Flavobacteriia      | Flavobacteriales  | Weeksellaceae     | Chryseobacterium | u.i | ASV255 | Baseline | 2.6479 | 0.0013 | 0.052±0.19   | 0            |
| Proteobacteria | Deltaproteobacteria | Desulfobacterales | Desulfobulbaceae  | Desulfobulbus    | u.i | ASV774 | Baseline | 2.5715 | 0.020  | 0.045±0.17   | 0            |
| Firmicutes     | Bacilli             | Lactobacillales   | Streptococcaceae  | Streptococcus    |     | ASV711 | 12 Weeks | 4.3652 | 0.0017 | 4.28±4.65    | 9.06±10.15   |
| Proteobacteria | Gammaproteobacteria | Thiotrichales     | Thiotrichaceae    | Cocleimonas      | u.i | ASV868 | 12 Weeks | 3.6995 | 0.040  | 0.25±1.19    | 1.29±3.55    |
| Firmicutes     | Bacilli             | Lactobacillales   | Carnobacteriaceae | Granulicatella   | u.i | ASV360 | 12 Weeks | 3.496  | 0.0031 | 0.57±0.53    | 1.17±1.08    |
| Bacteroidetes  | Bacteroidia         | Bacteroidales     | Prevotellaceae    | Prevotella       | u.i | ASV817 | 12 Weeks | 3.4407 | 0.023  | 0            | 0.0074±0.023 |
| Firmicutes     | Bacilli             | Lactobacillales   | Aerococcaceae     | Abiotrophia      | u.i | ASV648 | 12 Weeks | 3.2191 | 0.038  | 0.082±0.23   | 0.39±0.86    |
| Firmicutes     | Clostridia          | Clostridiales     | Mogibacteriaceae  | unidentified     | u.i | ASV882 | 12 Weeks | 3.1272 | 0.033  | 0.0084±0.042 | 0.020±0.070  |

|                |                     |                  |                   |                |             |         |          |        |       |               |             |
|----------------|---------------------|------------------|-------------------|----------------|-------------|---------|----------|--------|-------|---------------|-------------|
| Actinobacteria | Actinobacteria      | Actinomycetales  | Actinomycetaceae  | Actinomyces    | u.i         | ASV387  | 12 Weeks | 3.0968 | 0.006 | 0.0026±0.007  | 0.015±0.034 |
| Bacteroidetes  | Flavobacteriia      | Flavobacteriales | Flavobacteriaceae | Olleya         | u.i         | ASV714  | 12 Weeks | 3.0838 | 0.044 | 0.045±0.25    | 0.27±0.81   |
| Proteobacteria | Alphaproteobacteria | Rhodobacterales  | Rhodobacteraceae  | Octadecabacter | u.i         | ASV1053 | 12 Weeks | 2.8794 | 0.044 | 0             | 0.021±0.068 |
| Bacteroidetes  | Bacteroidia         | Bacteroidales    | Prevotellaceae    | Prevotella     | nanceiensis | ASV326  | 12 Weeks | 2.8573 | 0.024 | 0.0001±0.0007 | 0.041±0.17  |
| Bacteroidetes  | Saprospirae         | Saprospirales    | Saprospiraceae    | unidentified   | u.i         | ASV1500 | 12 Weeks | 2.7901 | 0.041 | 0.037±0.19    | 0.14±0.37   |
| Proteobacteria | Betaproteobacteria  | Neisseriales     | Neisseriaceae     | Neisseria      |             | ASV1433 | 12 Weeks | 2.7521 | 0.043 | 0.0134±0.042  | 0.094±0.20  |
| Proteobacteria | Gammaproteobacteria | Thiotrichales    | Thiotrichaceae    | Leucothrix     | u.i         | ASV784  | 12 Weeks | 2.7025 | 0.021 | 0.023±0.11    | 0.098±0.29  |

---
